# Supplementary material
Source: PubMed Central journal article supplement (PMC4390253)
Supplement: supp_M114.047159_mcp.M114.047159-1.pdf [file supp_M114.047159_mcp.M114.047159-1.pdf]

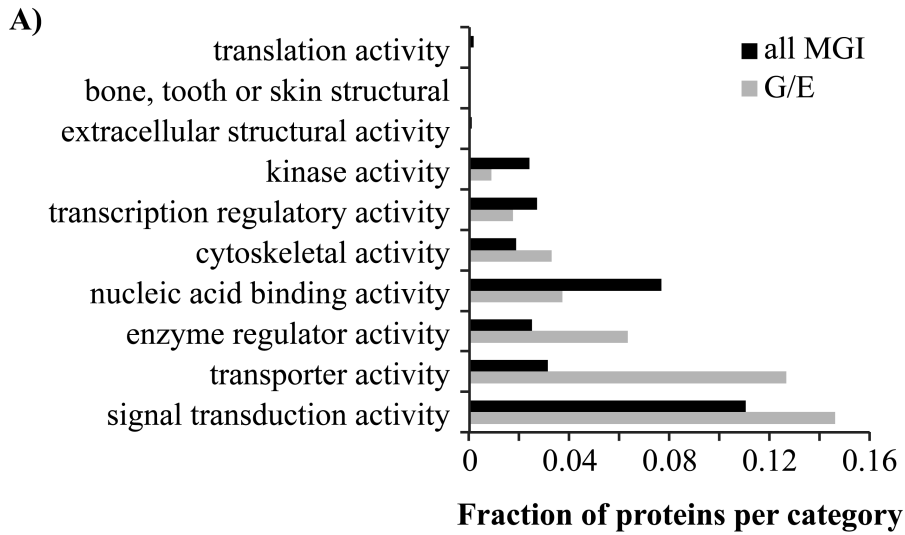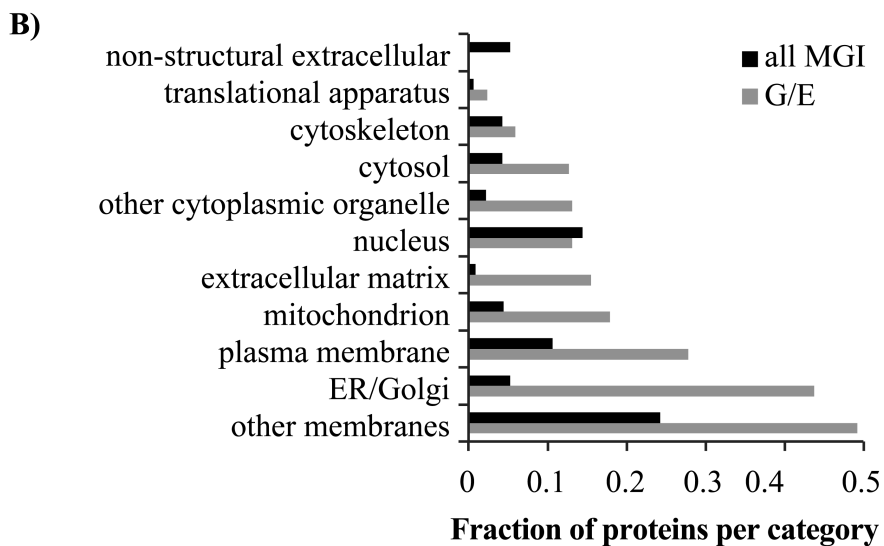

**Fig. 1 : Proteins enrichment analysis** : A comparative analysis of protein enrichment of the G/E fraction with respect to the total mouse proteome points out a strong enrichment of proteins involved in transport activity (4 times more than in the total mouse) (Pannel A), ER/Golgi proteins are the mostly represented in the G/E fraction (8.3 times more than in the total mouse proteome) (Pannel B).
