# Supplementary material
Source: PubMed Central journal article supplement (PMC4390253)
Supplement: supp_M114.047159_mcp.M114.047159-3.pdf [file supp_M114.047159_mcp.M114.047159-3.pdf]

| Post-Injection Time (min) | IR                   |              | ATIC                 |              | PTPLAD-1             |              |
|---------------------------|----------------------|--------------|----------------------|--------------|----------------------|--------------|
|                           | Area Ratio (average) | % of initial | Area Ratio (average) | % of initial | Area Ratio (average) | % of initial |
| n=3                       |                      |              |                      |              |                      |              |
| 0                         | 0.37                 | 100          | 0.304                | 100          | 0.713                | 100          |
| 2                         | 1.26                 | 340          | 0.365                | 120          | 0.737                | 103          |
| 15                        | 0.78                 | 211          | 0.418                | 138          | 1.110                | 156          |

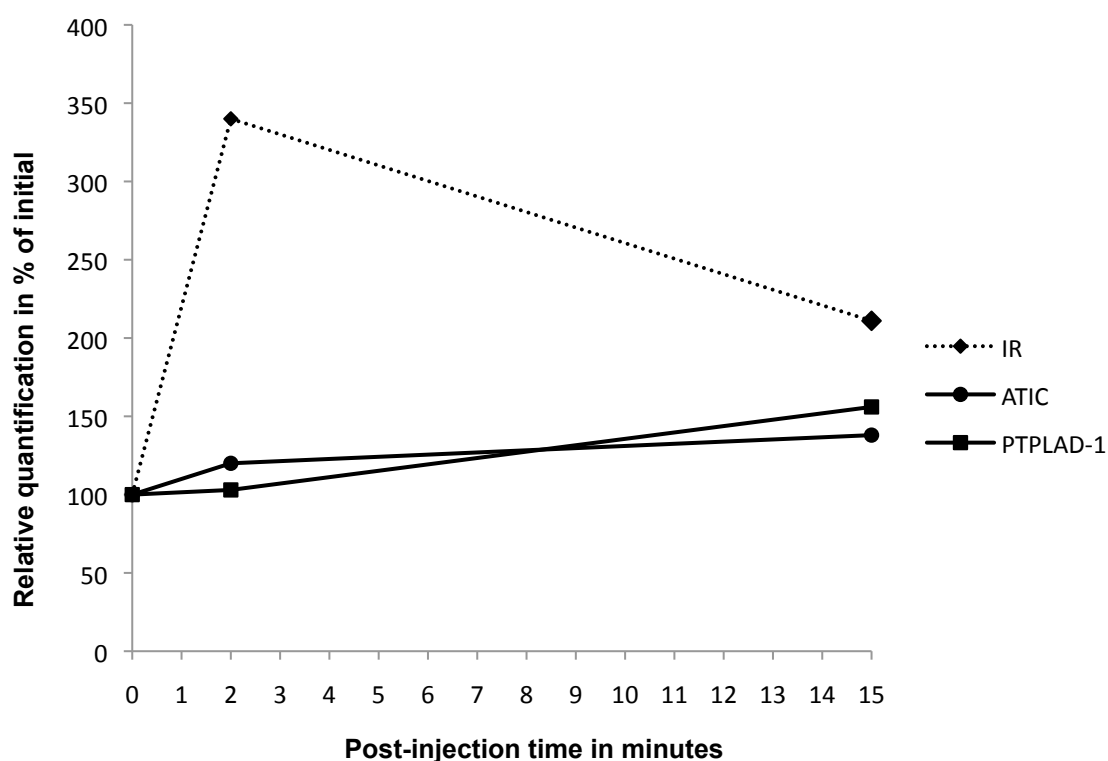

**Fig 3 Kinetics of IR, ATIC and PTPLAD1 accumulation in G/E fractions.** Rats were injected with insulin (1.5  $\mu\text{g}/100\text{g}$  body weight). G/E fractions were prepared from two livers at each time. Relative proteins contents were determined by LC –MRM as described in methods (see online table 1 for peptides and MRM transitions used). Each point of the progress curve is the mean S.D. of three experiments. Note that the 2 minutes peak value post-insulin injection for the IR is similar (3.5 fold) to the original values obtained using radiolabelled insulin saturation methods (Khan, M. N. et al. *J Biol Chem* 261, 8462, 1986).
