# Supplementary material
Source: PubMed Central journal article supplement (PMC4390253)
Supplement: supp_M114.047159_mcp.M114.047159-4.pdf [file supp_M114.047159_mcp.M114.047159-4.pdf]

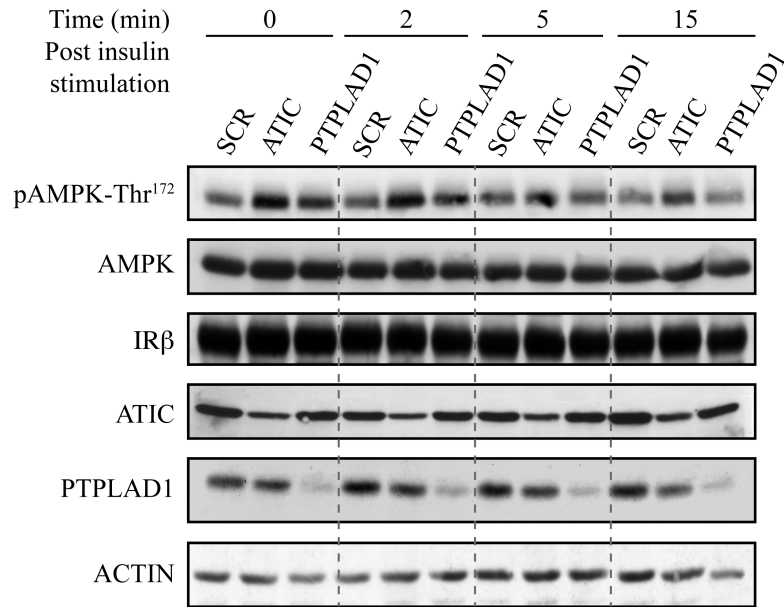

**Fig. 4: ATIC knockdown increases AMPK phosphorylation in HEK293 cells.**

HEK293 cells were transfected for 72 hours with ATIC or PTPLAD1 SiRNAs. They were preincubated in a serum free medium for 2 hours and stimulated for the indicated times with insulin. Immunoblots (25  $\mu$ g protein extracts) show IR, PTPLAD1, ATIC, AMPK, pAMPK-Thr172, levels. Note the increase in pAMPK-Thr172 phosphorylation levels not totally resumed after insulin stimulations.
