# Supplementary material
Source: PubMed Central journal article supplement (PMC4390253)
Supplement: supp_M114.047159_mcp.M114.047159-5.pdf [file supp_M114.047159_mcp.M114.047159-5.pdf]

Table 1 Peptides and MRM Transitions used for relative quantification

| <b>Protein/Peptide</b> | <b>Q1 (charge)</b> | <b>Q3 (type, charge)</b>      |
|------------------------|--------------------|-------------------------------|
| <b>P15127_IR</b>       |                    |                               |
| TIDSVTSAQELR           | 660.3 (+2)         | 804.4 (2y <sup>7</sup> , +1)  |
| TVNESASLR              | 488.8 (+2)         | 776.4 (2y <sup>7</sup> , +1)  |
|                        |                    |                               |
| <b>O35567_ATIC</b>     |                    |                               |
| NLASLGLSLVASGGTAK      | 779.9 (+2)         | 890.5 (2y <sup>10</sup> , +1) |
|                        |                    |                               |
| <b>D4ABI7_PTPLAD-1</b> |                    |                               |
| QVNITVQK               | 465.3 (+2)         | 588.4 (2y <sup>5</sup> , +1)  |
| LESEGSPETLTNLK         | 759.4 (+2)         | 915.5 (2y <sup>8</sup> , +1)  |
